# Supplementary material
Source: PubMed Central journal article supplement (PMC4408263)
Supplement: NIHMS674490-supplement.pdf [file NIHMS674490-supplement.pdf]

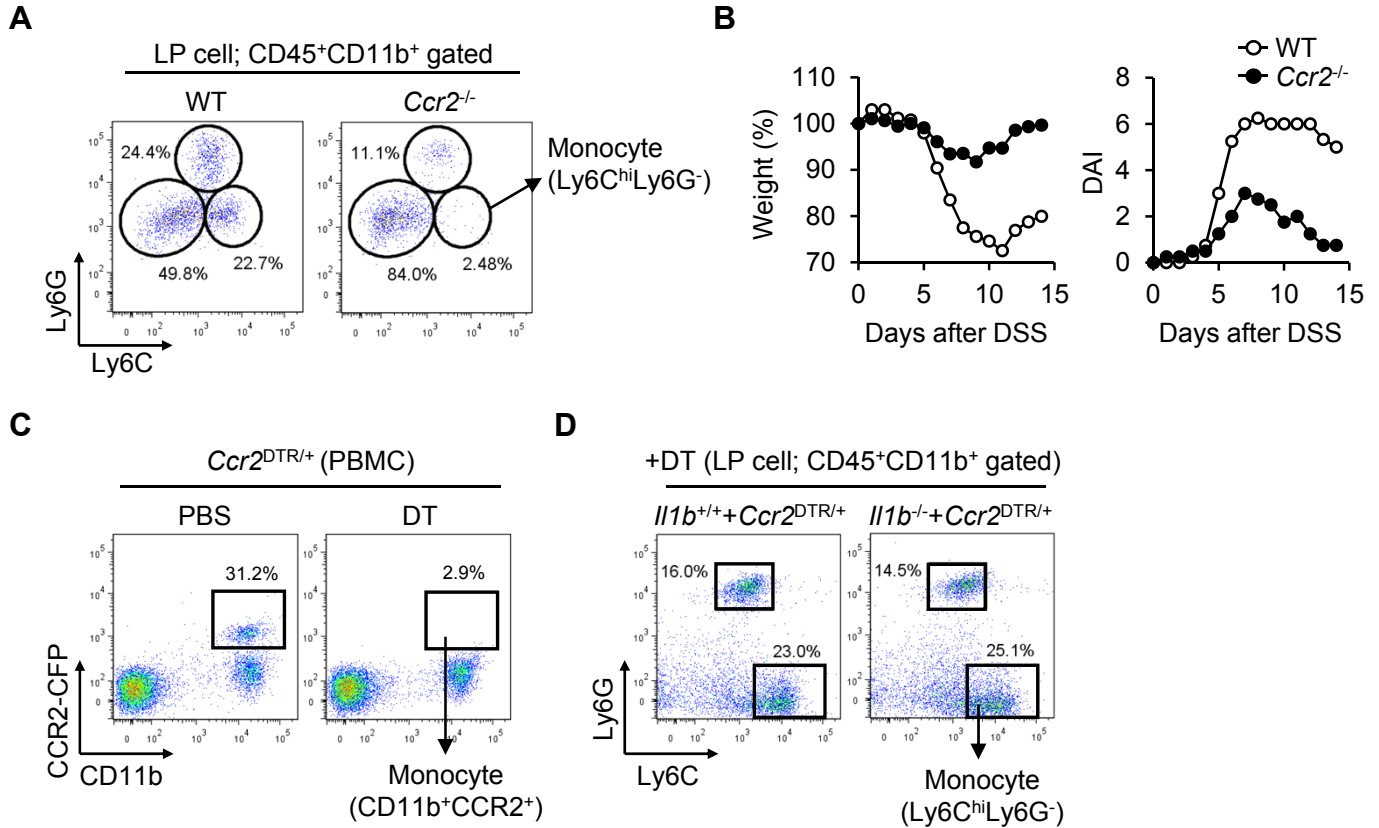

**Figure S1, related to Figure 4. Analysis of *Ccr2*<sup>-/-</sup> mice and mixed chimeric mice with deletion of IL-1 $\beta$  in CCR2<sup>+</sup> cells.**

(A) *Ccr2*<sup>-/-</sup> mice fail to recruit Ly6C<sup>high</sup> monocytes to the intestine on 7 days after DSS treatment.

(B) *Ccr2*<sup>-/-</sup> mice exhibit less weight loss and lower DAI scores than wild-type (WT) mice after 2% DSS treatment for 6 days.

(C) *Ccr2*<sup>DTR/+</sup> mice were treated with PBS or DT and depletion of monocytes was confirmed 2 days after treatment.

(D) Both *Il1b*<sup>+/+</sup> + *Ccr2*<sup>DTR/+</sup> and *Il1b*<sup>-/-</sup> + *Ccr2*<sup>DTR/+</sup> mixed chimeric mice were treated with 2.5% DSS and received DT on days 0, 3, and 6. The percentage of monocytes (CD11b<sup>+</sup>Ly6C<sup>high</sup>Ly6G<sup>-</sup>) was comparable between *Il1b*<sup>+/+</sup> + *Ccr2*<sup>DTR/+</sup> and *Il1b*<sup>-/-</sup> + *Ccr2*<sup>DTR/+</sup> mice on day 7.

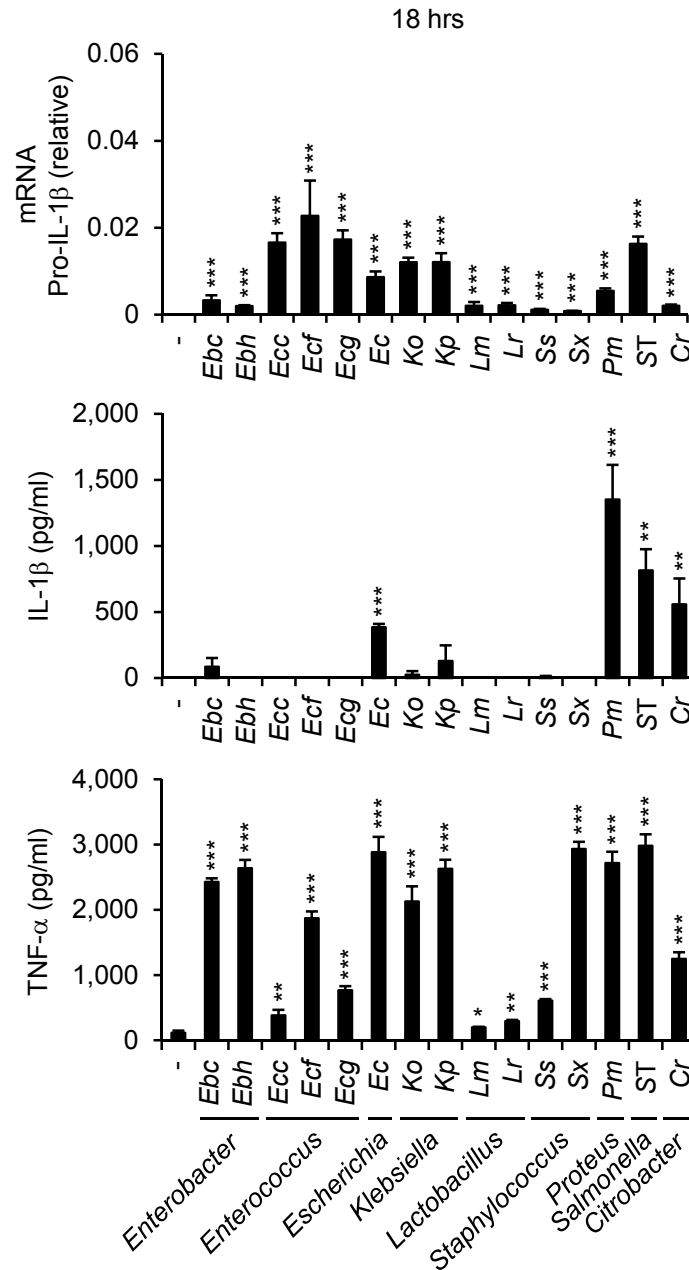

**Figure S2, related to Figure 5. Selective commensals induce IL-1 $\beta$  release.**

BMDM were stimulated with indicated mouse commensal bacteria for 18 hrs. Cytokine amounts in culture supernatant and pro-IL-1 $\beta$  mRNA levels were determined by ELISA and qRT-PCR, respectively. Data are representative of two experiments. Values present means of triplicated samples  $\pm$  SD. \* $p < 0.05$ , \*\* $p < 0.01$ , \*\*\* $p < 0.001$ .

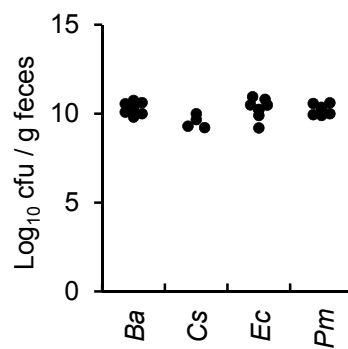

**Figure S3, related to Figure 5. Bacteria counts in feces from germ-free mice mono-associated with commensal bacteria.**

Germ-free mice were mono-associated with indicated mouse commensal bacteria. *Ba*, *Bacteroides acidifaciens*; *Cs*, *Clostridium sporogenes*; *Ec*, *Escherichia coli*, or *Pm*, *Proteus mirabilis*. Fecal samples were obtained 3 days after colonization and spread at different dilutions on blood agar plates (*Ba*, *Cs*) or MacConkey agar plates (*Ec*, *Pm*). Values represent samples from individual mice and results were pooled from three experiments with similar results.

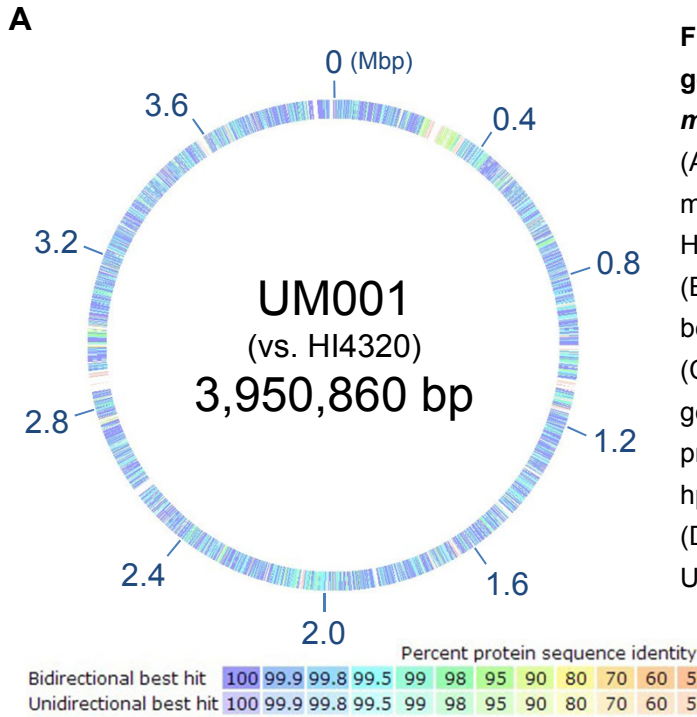

**Figure S4, related to Figure 6. Genome and virulence gene comparison between mouse and human *P. mirabilis*.**

(A) Schematic view of gene sequences in genomes from mouse *P. mirabilis* (UM001) and human reference strain HI4320.

(B) Amino acid sequence comparison of virulence factors between UM001 and HI4320.

(C) The *hpmA* hemolysin gene were amplified by PCR from genomic DNA isolated from UM001 and HI4320 using the primers *hpmA*(F); 5'-GTTGAGGGGCGTTATCAAGAGTC, *hpmA*(R); 5'-GATAACTGTTTTGCCCTTTTGTGC.

(D) Comparison of amino acid sequence of HpmA between UM001 (mouse) and HI4320 (human).

**B**

| Gene         | Function   | Homology        |
|--------------|------------|-----------------|
| <i>cheW</i>  | Chemotaxis | 166/166 (100%)  |
| <i>fliF</i>  | Flagellin  | 568/573 (99%)   |
| <i>hpmA</i>  | Hemolysin  | 1567/1577 (99%) |
| <i>mrpA</i>  | Fimbria    | 175/175 (100%)  |
| <i>spa47</i> | T3SS       | 404/409 (99%)   |
| <i>ureC</i>  | Urease     | 566/567 (99%)   |

**D**

HpmA; Identities 1567/1577 (99%), Positives 1573/1577 (99%)

|       |      |                                                               |      |
|-------|------|---------------------------------------------------------------|------|
| Mouse | 1    | MKSKNFKLSPSGRLAASLAIIFVSLNAYGNIVDPAGHQGPDVSAVNGGTQVINIVTPNN   | 60   |
| Human | 1    | MKSKNFKLSPSGRLAASLAIIFVSLNAYGNIVDPAGHQGPDVSAVNGGTQVINIVTPNN   | 60   |
| Mouse | 61   | EGISHNQYQDFNVGKPGAVFNNALEFGSQLAGHLNANSNLNGQAASLILNEVVSRRNPSF  | 120  |
| Human | 61   | EGISHNQYQDFNVGKPGAVFNNALEFGSQLAGHLNANSNLNGQAASLILNEVVSRRNPSF  | 120  |
| Mouse | 121  | LLGQQQEVFGIAAEYVLSNPNGITCDGCGFINTSRSSLVVGNPLFENGQLKGYSTLNNNTL | 180  |
| Human | 121  | LLGQQQEVFGIAAEYVLSNPNGITCDGCGFINTSRSSLVVGNPLFENGQLKGYSTLNNNTL | 180  |
| Mouse | 181  | LSLGKNGLNTGLLDLIAPRIDSRGKITAAEISAFTGQNTFSQHFDLSSQKPVSAALDSY   | 240  |
| Human | 181  | LSLGKNGLNTGLLDLIAPRIDSRGKITAAEISAFTGQNTFSQHFDLSSQKPVSAALDSY   | 240  |
| Mouse | 241  | FFGSMQSGRIRIINTAEGSGVKLAGKFTADNDLSVKADNIQTDSQVRYDSYDKDGSSENYQ | 300  |
| Human | 241  | FFGSMQSGRIRIINTAEGSGVKLAGKFTADNDLSVKADNIQTDSQVRYDSYDKDGSSENYQ | 300  |
| Mouse | 301  | NYRGGITVNNSSGSSQTLTKTELKGNITLVASHNQIKASDLMGDDITLQADLITDGKQ    | 360  |
| Human | 301  | NYRGGITVNNSSGSSQTLTKTELKGNITLVASHNQIKASDLMGDDITLQADLITDGKQ    | 360  |
| Mouse | 361  | LQKETDIDNRWFYSWKYDVTKEKEQIQQIGSQIDAKNNATLTATKGDVTLDAAKINAGN   | 420  |
| Human | 361  | LQKETDIDNRWFYSWKYDVTKEKEQIQQIGSQIDAKNNATLTATKGDVTLDAAKINAGN   | 420  |
| Mouse | 421  | NLAINANKDIHINGLEKESRSSENGNKRNHTSLESWSNSHQETLKASELTAGKDLG      | 480  |
| Human | 421  | NLAINANKDIHINGLEKESRSSENGNKRNHTSLESWSNSHQETLKASELTAGKDLG      | 480  |
| Mouse | 481  | LDAQSITAQGAKLHANENVLVNAKDNINLVNQTNNNDKVTVDNHHVMWGGIGGGQNKNN   | 540  |
| Human | 481  | LDAQSITAQGAKLHANENVLVNAKDNINLVNQTNNNDKVTVDNHHVMWGGIGGGQNKNN   | 540  |
| Mouse | 541  | NQQQVSHATQTLADGQLLAAADNNVNI TGSQVKNQGAQFVKTTQGDVVVDNASETISKI  | 600  |
| Human | 541  | NQQQVSHATQTLADGQLLAAADNNVNI TGSQVKNQGAQFVKTTQGDVVVDNASETISKI  | 600  |
| Mouse | 601  | DERGTAFNITKSSHKNETNKQSTGSELISDAQLTVVSGNDVNIIGSLIKSADKLGHS     | 660  |
| Human | 601  | DERGTAFNITKSSHKNETNKQSTGSELISDAQLTVVSGNDVNIIGSLIKSADKLGHS     | 660  |
| Mouse | 661  | LGDIVNKSAAQVTKIDDEKTSLAITGHAKEVEDEKQYSAGFHIHTTKNTSTETEQAANST  | 720  |
| Human | 661  | LGDIVNKSAAQVTKIDDEKTSLAITGHAKEVEDEKQYSAGFHIHTTKNTSTETEQAANST  | 720  |
| Mouse | 721  | ISGANVDLQANKDVTFAGSDLKTTAGNASITGDNVAFVSTENKQADNTDITISGGFSYT   | 780  |
| Human | 721  | ISGANVDLQANKDVTFAGSDLKTTAGNASITGDNVAFVSTENKQADNTDITISGGFSYT   | 780  |
| Mouse | 781  | GGVDKVGSKADFQYDKQHTQTEVTKNRGSQTEVAGDLTITANKDLLHEGASHHVEGRYQE  | 840  |
| Human | 781  | GGVDKVGSKADFQYDKQHTQTEVTKNRGSQTEVAGDLTITANKDLLHEGASHHVEGRYQE  | 840  |
| Mouse | 841  | SGENIQHLAVNDSETSCKTDSLNVGIDVGVNLDYSGVTKPVKKAIEDGVNTTKPGNNTDLT | 900  |
| Human | 841  | SGENIQHLAVNDSETSCKTDSLNVGIDVGVNLDYSGVTKPVKKAIEDGVNTTKPGNNTDLT | 900  |
| Mouse | 901  | KKVTARDAIANLANLSNLETPNVGVEVGKGGGSQKSITDSQAVSTSINAGKINIDSNNK   | 960  |
| Human | 901  | KKVTARDAIANLANLSNLETPNVGVEVGKGGGSQKSITDSQAVSTSINAGKINIDSNNK   | 960  |
| Mouse | 961  | LHDQGTHYQSTQEGISLANTHTSELAQDKHQTTFFHETKGGGQVGVSTKTSQSDITVAIKG | 1020 |
| Human | 961  | LHDQGTHYQSTQEGISLANTHTSELAQDKHQTTFFHETKGGGQVGVSTKTSQSDITVAIKG | 1020 |
| Mouse | 1021 | EGQTTDNALMETKAKGSQFTSNGDISINVGEDAHYEGAQFDAQKGGKTVINAGGDLTLAQ  | 1080 |
| Human | 1021 | EGQTTDNALMETKAKGSQFTSNGDISINVGEDAHYEGAQFDAQKGGKTVINAGGDLTLAQ  | 1080 |
| Mouse | 1081 | TDTHSESQSNVNGSANLKVGTTPESKDYGGGFNAGTTHHSKEQTTAKVGAITGSQGLELN  | 1140 |
| Human | 1081 | TDTHSESQSNVNGSANLKVGTTPESKDYGGGFNAGTTHHSKEQTTAKVGAITGSQGLELN  | 1140 |
| Mouse | 1141 | AGHNLTLQGTHLSSQDIALNATNKVDLQSSASERTKGNLNSGGVQAGFGKMKDDASS     | 1200 |
| Human | 1141 | AGHNLTLQGTHLSSQDIALNATNKVDLQSSASERTKGNLNSGGVQAGFGKMKDDASS     | 1200 |
| Mouse | 1201 | VNGLGSAQFAIGKQDEKSVSREGGTINNSGNLTINGNSVHLQGAQVNSKDTQLTQSQSDI  | 1260 |
| Human | 1201 | VNGLGSAQFAIGKQDEKSVSREGGTINNSGNLTINGNSVHLQGAQVNSKDTQLTQSQSDI  | 1260 |
| Mouse | 1261 | EITSAQSTDYKNNWGTDFGNKKTNTTPKEVTEEEKPATSIHNIIGKLLVNVVEDQKQKST  | 1320 |
| Human | 1261 | EITSAQSTDYKNNWGTDFGNKKTNTTPKEVTEEEKPATSIHNIIGKLLVNVVEDQKQKST  | 1320 |
| Mouse | 1321 | QATLETGTLTINSNKDLTLSGANVTADSVTGNVGGSLNIASQKESDRHVTVGVNVGNH    | 1380 |
| Human | 1321 | QATLETGTLTINSNKDLTLSGANVTADSVTGNVGGSLNIASQKESDRHVTVGVNVGNH    | 1380 |
| Mouse | 1381 | TNDPKSSQVNTAKAGGSLLEKTIKDTIDSGIKSSTDAISDKYNSLSTIADKGTISDET    | 1440 |
| Human | 1381 | TNDPKSSQVNTAKAGGSLLEKTIKDTIDSGIKSSTDAISDKYNSLSTIADKGTISDET    | 1440 |
| Mouse | 1441 | KAKIDQGFQKGVNGIKNIIVTGAEGHTANADIKVTHVDNDAVTKTSTLSTNNDLNLVNGS  | 1500 |
| Human | 1441 | KAKIDQGFQKGVNGIKNIIVTGAEGHTANADIKVTHVDNDAVTKTSTLSTNNDLNLVNGS  | 1500 |
| Mouse | 1501 | TKLTGAEIASQGVLDLGGSSVKLENIIEGHYEAAGADLRLKSSVVLDLAKQLVGGDISFKS | 1560 |
| Human | 1501 | TKLTGAEIASQGVLDLGGSSVKLENIIEGHYEAAGADLRLKSSVVLDLAKQLVGGDISFKS | 1560 |
| Mouse | 1561 | PVKTNETVNTKASISEK 1577                                        |      |
| Human | 1561 | PVKTNETVNTKASISEK 1577                                        |      |

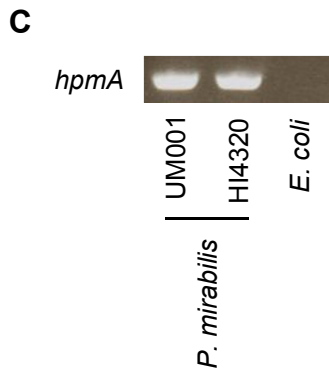

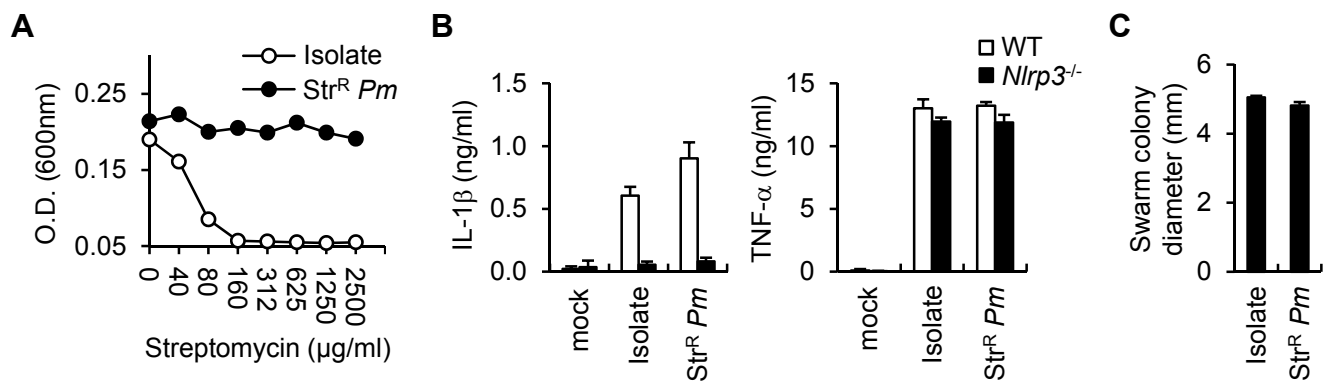

**Figure S5, related to Figure 7. Generation of streptomycin-resistant *P. mirabilis* (Str<sup>R</sup> Pm).**

(A) Mouse-isolated *P. mirabilis* strain UM001 resistant to streptomycin (Str<sup>R</sup> Pm) and parental strain (Isolate) were grown in LB medium containing different concentration of streptomycin.

(B) Parental strain (Isolate) and Str<sup>R</sup> Pm strain were used to stimulate WT and *Nlrp3*<sup>-/-</sup> BMDM for 3 hrs. Cytokine levels were determined by ELISA.

(C) Parental strain (Isolate) and Str<sup>R</sup> Pm strain were inoculated in LB broth for 6 hrs and 10 µl of inoculum was placed in the center of LB plate. Swarm colony diameter was measured after 18 hours of culture at 37°C.

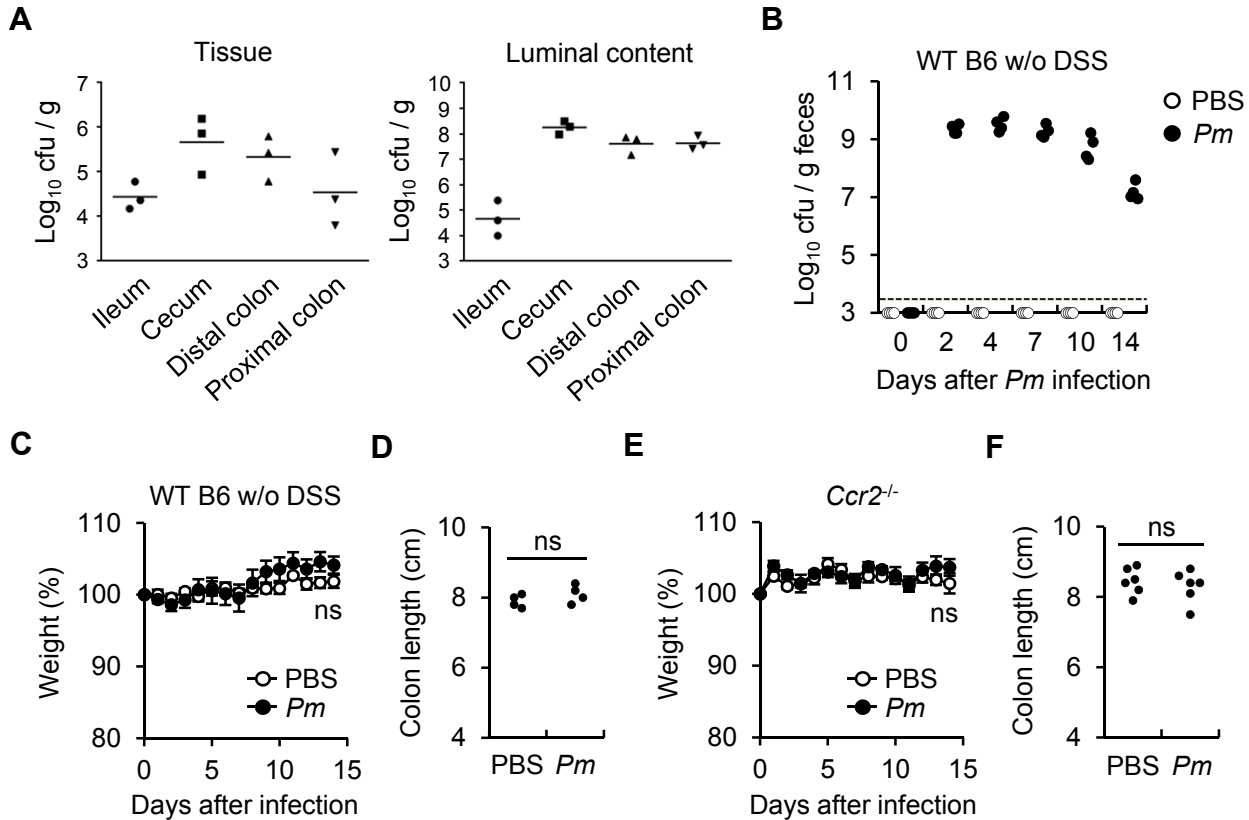

**Figure S6, related to Figure 7. Colonization with *P. mirabilis* requires DSS treatment to exacerbate colitis.**

(A) Mice were treated orally with 20 mg streptomycin and 24 hrs later the mice were gavaged with  $1 \times 10^9$  cfu of streptomycin-resistant *P. mirabilis* (*Pm*). Bacteria numbers were counted from tissue and luminal contents on day 4 after infection ( $n = 3$ ). Data are representative for two experiments.

(B)-(F) Mice were treated with streptomycin as in Figure 7A and gavaged with  $10^9$  cfu of streptomycin-resistant *P. mirabilis* (*Pm*). (B) Bacteria numbers in the feces of gavaged wild-type (WT) mice are shown. Bacterial burden in feces at indicated time points are shown ( $n = 4$ , each group). (C) Body weight of infected wild-type mice was monitored for 2 weeks. (D) Mice were sacrificed and colon length measured on day 15. (E) *Ccr2*<sup>-/-</sup> mice were gavaged with *Pm* on day 0, 4, 8. Mice were given 1% DSS from day 0 in the drinking water. Body weight was monitored for 2 weeks and intestinal inflammation was assessed on day 15. ns; not significant.

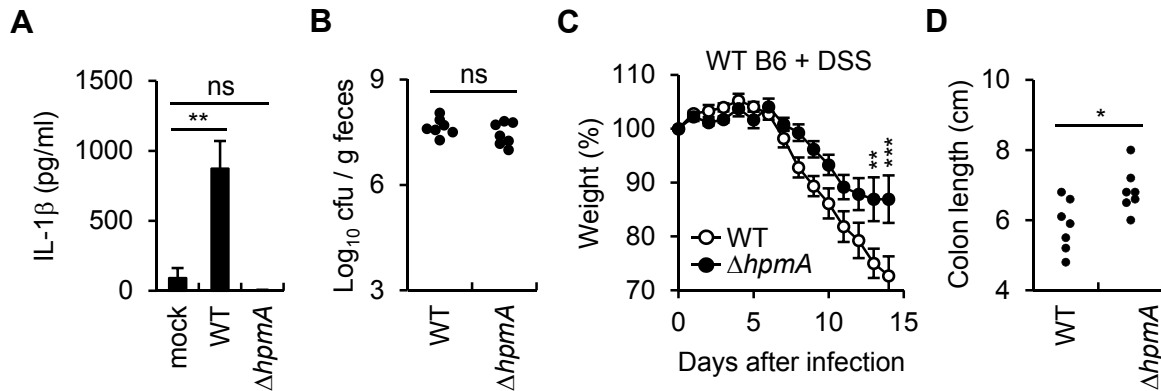

**Figure S7, related to Figure 7. Hemolysin A of mouse-isolated *P. mirabilis* induces IL-1 $\beta$  production in BMDM and enhances DSS colitis.**

(A) BMDM were stimulated with WT or hemolysin A-deficient mutant ( $\Delta hpmA$ ) streptomycin-resistant *P. mirabilis* for 3 hrs and IL-1 $\beta$  in culture supernatant were measured by ELISA. Means  $\pm$  SD are shown. \*\* $p < 0.01$ , ns; not significant.

(B)-(D) Mice were treated with streptomycin as in Figure 7A and gavaged with  $10^9$  cfu of WT or  $\Delta hpmA$  mouse-isolated streptomycin-resistant *P. mirabilis*. Mice were treated with 1% DSS from day 0 to 10 and infected with *P. mirabilis* at day 0, 4, 8 ( $n = 7$ , each group, pooled from 2 separate experiment with similar results). (B) Bacteria numbers in the feces of inoculated mice were determined on day 4. (C) Mouse body weight was monitored for 2 weeks. Means  $\pm$  SEM are shown. (D) Mice were sacrificed on day 15 and colon lengths were measured. \* $p < 0.05$ , \*\* $p < 0.01$ .
